# Supplementary material for: Tuning of intrinsic antiferromagnetic to ferromagnetic ordering in microporous α-MnO2 by inducing tensile strain
Source: Royal Society of Chemistry journal article supplement (doi:10.1039/c6cp07259c), 2017-01-01
Supplement: c6cp07259c1.pdf [file c6cp07259c1.pdf]

## Supporting Information

### Tuning of intrinsic antiferromagnetic to ferromagnetic ordering in microporous $\alpha$ -MnO<sub>2</sub> by inducing tensile strain

G.Kruthika<sup>a,b</sup>, J.Karthikeyan<sup>a,b</sup>, and P.Murugan<sup>a,b\*</sup>

<sup>a</sup>Functional Materials Division, CSIR Central Electrochemical Research Institute (CECRI), Karaikudi-630 003, Tamil Nadu, India

<sup>b</sup>Academy of Scientific & Innovative Research, CECRI, India

\*E-mail: murugan@cecri.res.in.

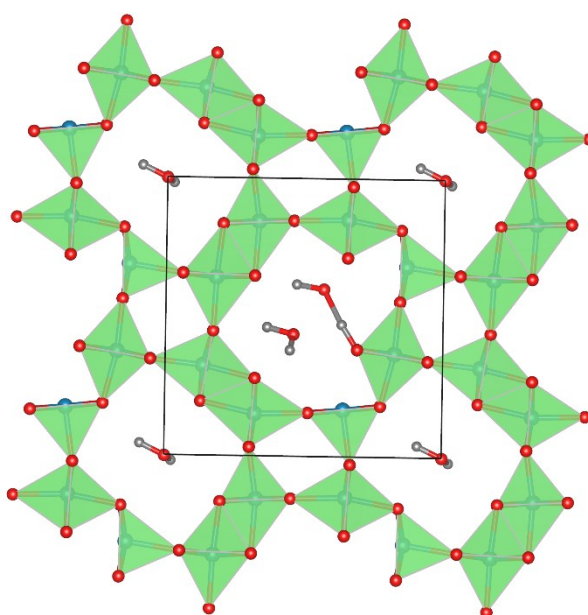

Fig. S1: Polyhedral model of optimized structure of  $\alpha$ -MnO<sub>2</sub>.0.375H<sub>2</sub>O compound. It is observed that the tunnel accommodated with two water molecules distorts the crystal structure. Thus, it gives lesser stability as compared to  $\alpha$ -MnO<sub>2</sub>.0.25H<sub>2</sub>O compound.

Table. S1. Number of sites obeying GKA rule (two Mn atoms that are connected through O(sp<sup>2</sup>) atoms) and triangular ( $\Delta$ ) rule (in the double chain) in different types of magnetic configurations of  $\alpha$ -MnO<sub>2</sub>.0.25 H<sub>2</sub>O.

| Type          | AFM-C                      | AFM-C2                 | AFM-A2                     | FM                         | FIM                     |
|---------------|----------------------------|------------------------|----------------------------|----------------------------|-------------------------|
| $\Delta$ rule | All 4 sites are not obeyed | All 4 sites are obeyed | All 4 sites are not obeyed | All 4 sites are obeyed     | All 4 sites are obeyed  |
| GKA rule      | All 4 sites are obeyed     | All 4 sites are obeyed | All 4 sites are not obeyed | All 4 sites are not obeyed | Only 2 sites are obeyed |

(a)

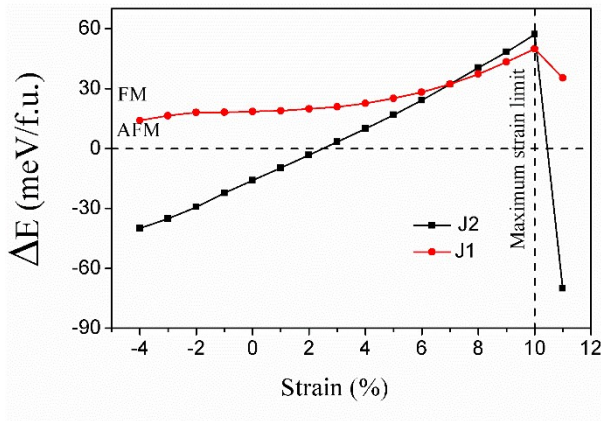

(b)

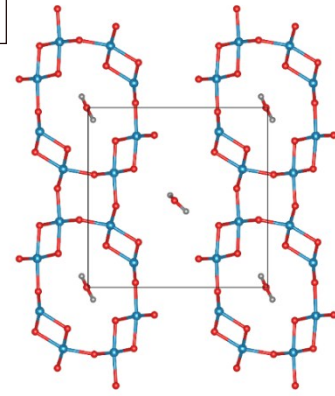

Fig. S2 (a). Exchange energies ( $J_1$ ,  $J_2$ ) are shown with respect to triaxial strain. (b) Optimized structure distorted at 11% tensile strained  $\alpha\text{-MnO}_2 \cdot 0.25\text{H}_2\text{O}$ . It is observed that at 11% tensile strain, the linkage between double chains is broken.

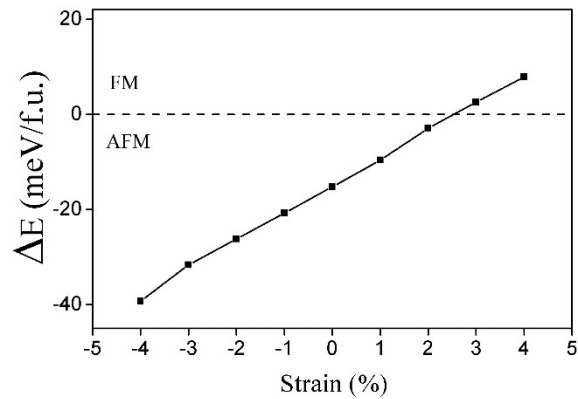

Fig. S3. Exchange energy ( $J_2$ ) for unhydrated  $\alpha\text{-MnO}_2$  compound. It shows that the FM ordering is induced by an application of 3% tensile strain.

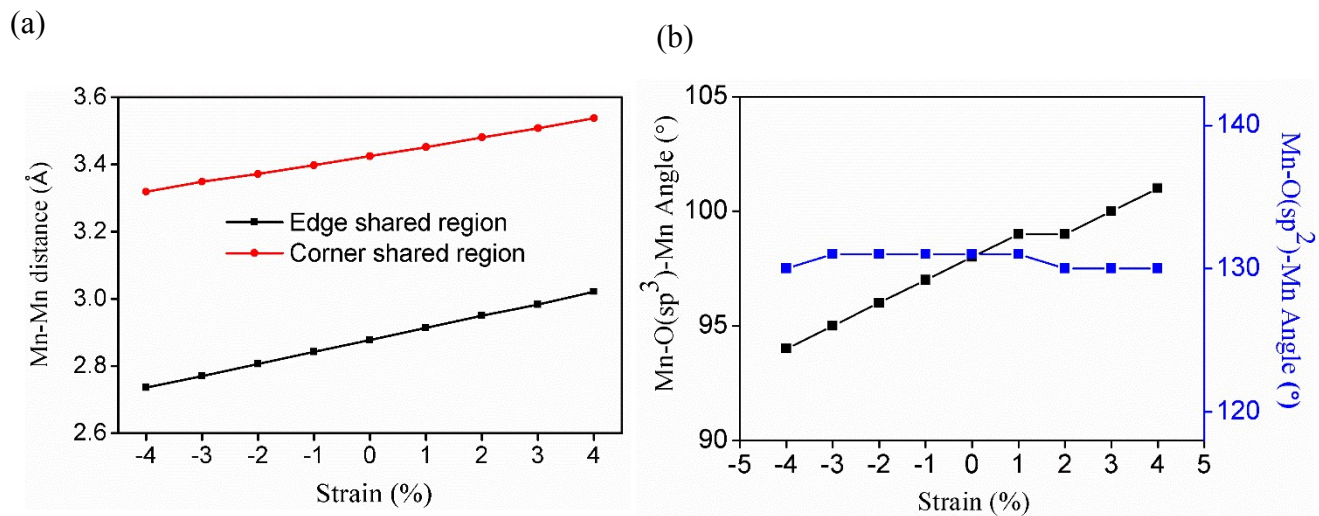

Fig. S4: Variation of (a) Mn-Mn distance and (b) Mn-O-Mn angle with respect to the triaxial strain introduced in the  $\alpha\text{-MnO}_2 \cdot 0.25\text{H}_2\text{O}$  compound. All the values are given for AFM-C2 configuration.

Table. S2. Comparison of various parameters of unstrained and 4% tensile strained  $\alpha\text{-MnO}_2 \cdot 0.25\text{H}_2\text{O}$  compound, calculated using different exchange correlation functionals (PW91 and PBE).

|                                                               |      | Unstrained | 4% tensile strain |
|---------------------------------------------------------------|------|------------|-------------------|
| Moment on Mn atoms ( $\mu_B$ )                                | PW91 | 3.2        | 3.4               |
|                                                               | PBE  | 3.1        | 3.3               |
| Exchange Energy ( $\Delta = E_{\text{afmc2-fm}}$ ) (meV/f.u.) | PW91 | -16        | 10                |
|                                                               | PBE  | -9         | 19                |

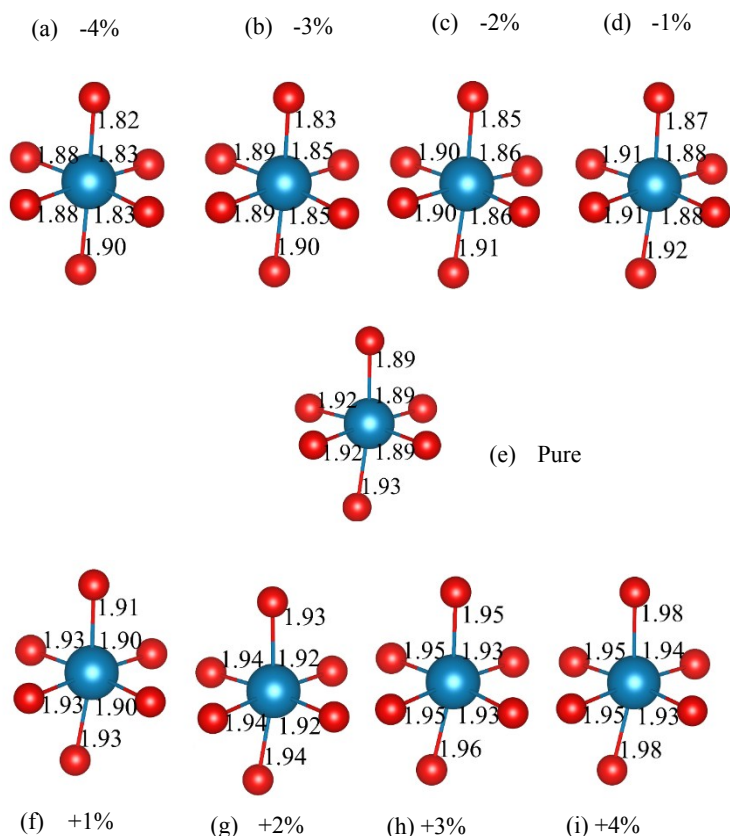

Fig. S5: The distortion in geometry of  $\text{MnO}_6$  octahedra are shown for various triaxial strained  $\alpha\text{-MnO}_2$  compounds. Mn-O bond distances (in Å) are given in the diagram.

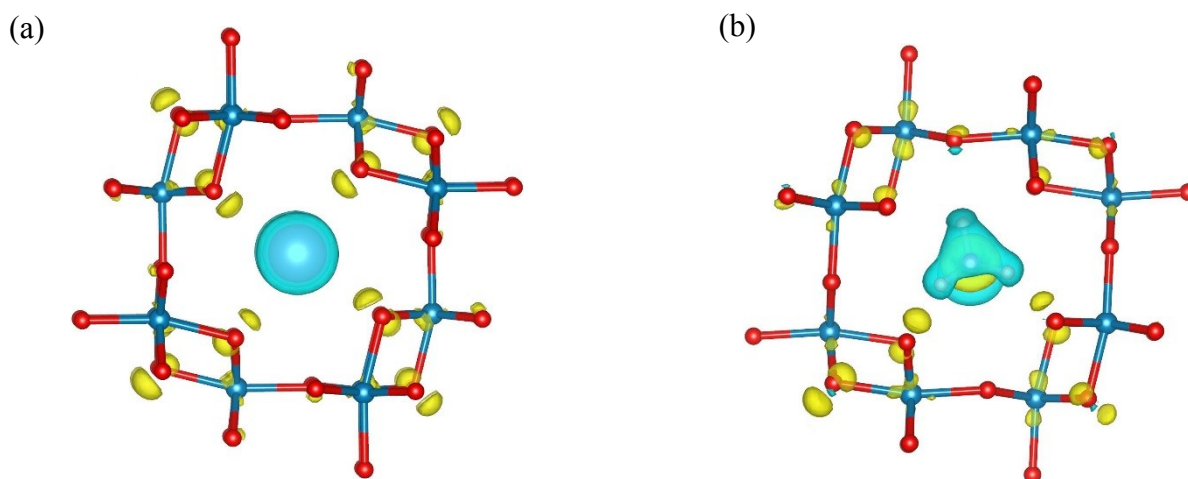

Fig. S6: Charge transfer between sorbent and  $\alpha\text{-MnO}_2$  framework ( $\Delta\rho = \rho_{\alpha\text{-MnO}_2 \cdot 0.25X} - \rho_{\alpha\text{-MnO}_2} - \rho_X$ ) is shown for  $\alpha\text{-MnO}_2 \cdot 0.25X$  compound, where  $X = \text{Xe}$  (a) and  $\text{NH}_3$  (b). It demonstrates that the small charge transfer is occurred between the tunnel species and lattice oxygen. Isosurface for respective compounds are plotted for values of  $3 \times 10^{-3}$  and  $4 \times 10^{-3} \text{ e}/\text{\AA}^3$  respectively. Yellow (blue) isosurface represents charge accumulation (depletion) region.

Table. S3. Lattice parameters, relative energy of  $\alpha$ -MnO<sub>2</sub> compound having various tunnel species with respect to different (AFM-C2, FM) magnetic configurations and local magnetic moment (absolute average value) of Mn, O(sp<sup>3</sup>), O(sp<sup>2</sup>) atoms in their stable ground state magnetic configurations.

| Tunnel species    | Lattice parameters (Å) |       |      | Magnetic configurations (meV/f.u.) |    | Local magnetic moment ( $\mu_B$ ) |                     |                     |
|-------------------|------------------------|-------|------|------------------------------------|----|-----------------------------------|---------------------|---------------------|
|                   | a                      | b     | c    | AFM-C2                             | FM | Mn                                | O(sp <sup>3</sup> ) | O(sp <sup>2</sup> ) |
| Ar                | 9.83                   | 9.83  | 2.90 | 0                                  | 12 | 3.2                               | 0.2                 | 0.0                 |
| Kr                | 9.86                   | 9.87  | 2.92 | 0                                  | 8  | 3.3                               | 0.2                 | 0.0                 |
| Xe                | 9.99                   | 9.99  | 2.96 | 28                                 | 0  | 3.4                               | 0.2                 | 0.1                 |
| NH <sub>3</sub>   | 10.04                  | 9.73  | 2.89 | 20                                 | 0  | 3.4                               | 0.2                 | 0.1                 |
| CH <sub>4</sub>   | 9.69                   | 9.89  | 2.90 | 0                                  | 13 | 3.2                               | 0.2                 | 0.0                 |
| H <sub>2</sub> S  | 9.92                   | 9.98  | 2.79 | 0                                  | 83 | 3.0                               | 0.1                 | 0.0                 |
| Li <sub>2</sub> O | 9.80                   | 10.14 | 2.89 | 2                                  | 0  | 3.5                               | 0.2                 | 0.1                 |
